# Supplementary material for: Root-Knot-Nematode-Encoded CEPs Increase Nitrogen Assimilation
Source: MDPI journal article supplement (doi:10.3390/life13102020), 2023-10-07
Supplement: s1 [file s1]

Supplemental Table S1. Sequences of CEP-like peptides discovered in RKN genomes

| RKN Species                            | CEP Names | CEP Sequences    |
|----------------------------------------|-----------|------------------|
| <i>M. hapla</i><br>(PRJNA29083)        | MhCEP1    | DFRPTNPGHSPGIGH  |
|                                        | MhCEP2    | AFRPTAPGHSPGVGH  |
|                                        | MhCEP3    | GYQPTNPGHSPGIGH  |
|                                        | MhCEP4    | FKTVPGQSSPGVGH   |
|                                        | MhCEP5    | VIKPACIGNSPGVGH  |
|                                        | MhCEP6    | AFRPTNPGPSAIGH   |
|                                        | MhCEP7    | GFRPTNPGNSPGAGH  |
|                                        | MhCEP8    | TFRPTAPGHSPGIGN  |
|                                        | MhCEP9    | PFCTGPGHSPGVGH   |
|                                        | MhCEP10   | PFCTGSGHSPGVGH   |
|                                        | MhCEP11   | AFRPTAPGHSPGVGH  |
|                                        | MhCEP12   | PFHTGTGRSPGAGH   |
| <i>M. graminicola</i><br>(PRJNA411966) | MgCEP1    | FRVLKPGGSPVGLG   |
|                                        | MgCEP2    | HTPGVG           |
| <i>M. incognita</i><br>(PRJEB8714)     | MiCEP1    | RPTEPGHSPGAGH    |
|                                        | MiCEP2    | FRPTNPGPSPGVGH   |
|                                        | MiCEP3    | PTGPGHSPGVGN     |
|                                        | MiCEP4    | RATEPGHSPGAGH    |
|                                        | MiCEP5    | DTRPTEPGHSPGAGH  |
|                                        | MiCEP6    | RPTQPGHSPGVGN    |
|                                        | MiCEP7    | TEPGHSPGAGH      |
|                                        | MiCEP8    | RPTNPGHSPGAGH    |
|                                        | MiCEP9    | DVHPNNPGHSPGIGH  |
|                                        | MiCEP10   | RPTQPGHSPGVGN    |
|                                        | MiCEP11   | VHPNNPGHSPGIGH   |
| <i>M. arenaria</i><br>(PRJNA438575)    | MaCEP1    | FRSTCPASSAAA     |
|                                        | MaCEP2    | QPIHSPSYSH       |
|                                        | MaCEP3    | FNPNNLPGNCP      |
|                                        | MaCEP4    | FNPNNLPGNCP      |
|                                        | MaCEP5    | SFRSTCPASSAAA    |
|                                        | MaCEP6    | RPTFG            |
|                                        | MaCEP7    | SFRSTCPASSAAA    |
| <i>M. enterolobii</i><br>(PRJNA340324) | MeCEP1    | FRPTVPGHSPGIGH   |
|                                        | MeCEP2    | FQPTSPGHSPGIGH   |
|                                        | MeCEP3    | IKPTNPGHSPGGGH   |
|                                        | MeCEP4    | DKRATNPGHSPGVGN  |
|                                        | MeCEP5    | DTSKPTAPGHSPGIGH |
|                                        | MeCEP6    | FQPTAPGHSPGIGH   |
|                                        | MeCEP7    | DYRQTHPGNSPGIGH  |
|                                        | MeCEP8    | DYRETHPGNSPGIGH  |
|                                        | MeCEP9    | DYRQTHPGNSPGIGH  |
|                                        | MeCEP10   | DYRPTEPGHSPGVGH  |
|                                        | MeCEP11   | DKRPTAPGHSPGIGH  |
|                                        | MeCEP12   | DKRQTNPGNSPGVGN  |
|                                        | MeCEP13   | DKRATNPGHSPGVGN  |
|                                        | MeCEP14   | DKRATNPGHSPGVGN  |
| <i>M. floridensis</i><br>(PRJNA340324) | MfCEP1    | DVHPNNPGHSPGIGH  |
|                                        | MfCEP2    | DTRPTEPGHSPGAGH  |
|                                        | MfCEP3    | RATEPGHSPGAGH    |
|                                        | MfCEP4    | RATEPGHSPGAGH    |
|                                        | MfCEP5    | DFRPTNPGHSPGVGH  |
|                                        | MfCEP6    | RPTQPGHSPGVG     |
|                                        | MfCEP7    | RPTNPGHSPGAGH    |

M. javanica  
(PRJNA340324)

MfCEP8  
MjCEP1  
MjCEP2  
MjCEP3  
MjCEP4  
MjCEP5  
MjCEP6  
MjCEP7  
MjCEP8  
MjCEP9  
MjCEP10  
MjCEP11  
MjCEP12  
MjCEP13  
MjCEP14

RPTNPGHSPGAGH  
DVHPNPNPGHSPGIGH  
DTRPTEPGHSPGAGH  
RPTNPGHSPGAGH  
DFRPTYPGHSPGVGH  
RPTGPGHSPGVGN  
RATEPGHSPGAGH  
DVHPNPNPGHSPGVGH  
DFRPTNPGHSPGVGH  
RSTGPGHSPGVGNH  
RPTEPGHSPGAGH  
FRPTNPGPSPGVGH  
DFRETNP GKSPRIGH  
TAPGHSPGIGN  
DVHPNPNPGHSPGIGH

---
